# Supplementary material
Source: PubMed Central journal article supplement (PMC8299533)
Supplement: NIHMS1696190-supplement-Supplementary_Figure_1.pdf [file NIHMS1696190-supplement-Supplementary_Figure_1.pdf]

# Supplementary Figure 1

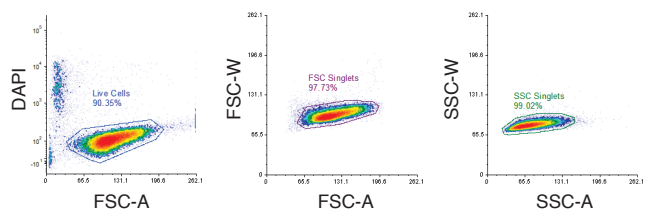

| Gate         | # of events | % of gated cells | % of all cells |
|--------------|-------------|------------------|----------------|
| None         | 34026       | 100.00           | 100.00         |
| Live Cells   | 30742       | 90.35            | 90.35          |
| FSC Singlets | 30045       | 88.3             | 88.3           |
| SSC Singlets | 29752       | 87.44            | 87.44          |

Supplementary Table 1

| <b>ID</b> | <b>Lipid Species</b> |
|-----------|----------------------|
| 1         | PC(16:0e_22:4)       |
| 2         | PC(18:0_22:4)        |
| 3         | PC(16:1e_22:4)       |
| 4         | PC(18:0_22:4)        |
| 5         | PC(16:0_22:4)        |
| 6         | PC(14:1e_22:6)       |
| 7         | PC(18:1_22:6)        |
| 8         | PC(16:0_22:6)        |
| 9         | PC(18:1_22:2)        |
| 10        | PC(18:1_22:6)        |
| 11        | PC(16:0_20:4)        |
| 12        | PC(16:1_18:2)        |
| 13        | PC(14:1e_22:6)       |
| 14        | PC(18:1_22:5)        |
| 15        | PC(16:0_22:6)        |
| 16        | PC(20:1_20:4)        |
| 17        | PC(15:0_22:4)        |
| 18        | PC(14:1e_22:5)       |
| 19        | PC(12:1e_22:6)       |
| 20        | PC(19:1_20:4)        |
| 21        | PC(16:1_20:4)        |
| 22        | PC(18:0_18:2)        |
| 23        | PC(12:1e_22:6)       |
| 24        | PC(12:1e_22:4)       |
| 25        | PC(12:1e_22:5)       |
| 26        | PC(18:1_20:4)        |
| 27        | PC(16:0_20:4)        |
| 28        | PC(17:1_22:6)        |
| 29        | PC(15:0_20:4)        |
| 30        | PC(17:1_22:6)        |
| 31        | PC(16:1_20:4)        |
| 32        | PC(18:0_18:2)        |
| 33        | PC(14:1e_20:4)       |

Supplementary Table 2

| sgRNA Oligos    |                                          |                                          |
|-----------------|------------------------------------------|------------------------------------------|
| Gene            | Forward Oligo (5'-3')                    | Reverse Oligo (5'-3')                    |
| <i>SFXN1</i>    | caccGTAGCCTTACTTGACAGTGA                 | aaacTCACTGTCAAGTAAGGCTAC                 |
| <i>GCH1</i>     | caccGCAGCAATGGGTTCCCGAG                  | aaacCTCGGGGAACCCATTGCTGC                 |
| <i>SPR</i>      | caccGGAGCATGGAGGGCGGGCTG                 | aaacCAGCCCGCCCTCCATGCTCC                 |
| <i>PTS</i>      | caccGTGTGGTGACAGTACATGGAG                | aaacCTCCATGTACTGTCACCACAC                |
| <i>ACSL4</i>    | caccGAATGACAAGCCAAACCCAG                 | aaacCTGGGGTTTGGCTTGTCAATC                |
| <i>NOS3</i>     | caccGAGCCAACGTGGAGATCACCG                | aaacCGGTGATCTCCACGTTGGCTC                |
| <i>AGMO</i>     | caccGCTTACCATGAGCCATACGA                 | aaacTCGTATGGCTCATGGTAAGC                 |
| <i>QDPR</i>     | caccgAGCCTGGCTGGGAAGAAGCAG               | aaacCTGTTCTTCCCAGCCAGGCTC                |
| <i>GPX4</i>     | caccGAATTTGACGTTGTAGCCCG                 | aaacCGGGCTACAACGTCAAATTC                 |
| <i>DHFR</i>     | caccGACATGGTCTGGATAGTTGG                 | aaacCCAACATCCAGACCATGTC                  |
| PCR Primers     |                                          |                                          |
| Gene            | Forward (5'-3')                          | Reverse (5'-3')                          |
| GCH1 isoform    | GCCGGATCTAGCTAGTTAATTAAGCCACCATGGAAAAGGG | GGGCGGAATTTACGTAGCTCAGGTAGCTTCAACCACTACC |
| qRT-PCR Primers |                                          |                                          |
| Gene            | Forward Primer (5'-3')                   | Reverse Primer (5'-3')                   |
| SLC7A11         | TGTGTGGGGTCTGTCACCTA                     | CAGTAGCTGCAGGGCGTATT                     |
| GAPDH           | TTGGTATCGTGGAAGGACTC                     | ACAGTCTTCTGGGTGGCAGT                     |
